# Supplementary material for: In situ ammonium formation mediates efficient hydrogen production from natural seawater splitting
Source: PubMed Central journal article supplement — Nat Commun. 2024 Nov 1;15:9462. doi: 10.1038/s41467-024-53724-1 (PMC11530463; doi:10.1038/s41467-024-53724-1), 2024-11-01
Supplement: 41467_2024_53724_MOESM2_ESM.pdf [file 41467_2024_53724_MOESM2_ESM.pdf]

## Description of Additional Supplementary Files

File Name: **Supplementary Data 1**

Description: The optimized structures of InN, Mo<sub>2</sub>N, ScN, TiN, YN, ZrN, Ni<sub>3</sub>N, Mo<sub>2</sub>N (011), Mo (011) and Pt (111).
